# Supplementary material for: Predictive End-to-End Enterprise Process Network Monitoring
Source: Springer Nature journal article supplement (doi:10.1007/s12599-022-00778-4), 2022-12-06
Supplement: MOESM1 [file 23796906]

# **Predictive End-to-End Enterprise Process Network Monitoring**

**Felix Oberdorf, Myriam Schaschek, Sven Weinzierl, Nikolai Stein, Martin Matzner, Christoph M. Flath**

Business & Information Systems Engineering (2022)

**Appendix (available online via <http://link.springer.com>)**

# Appendix

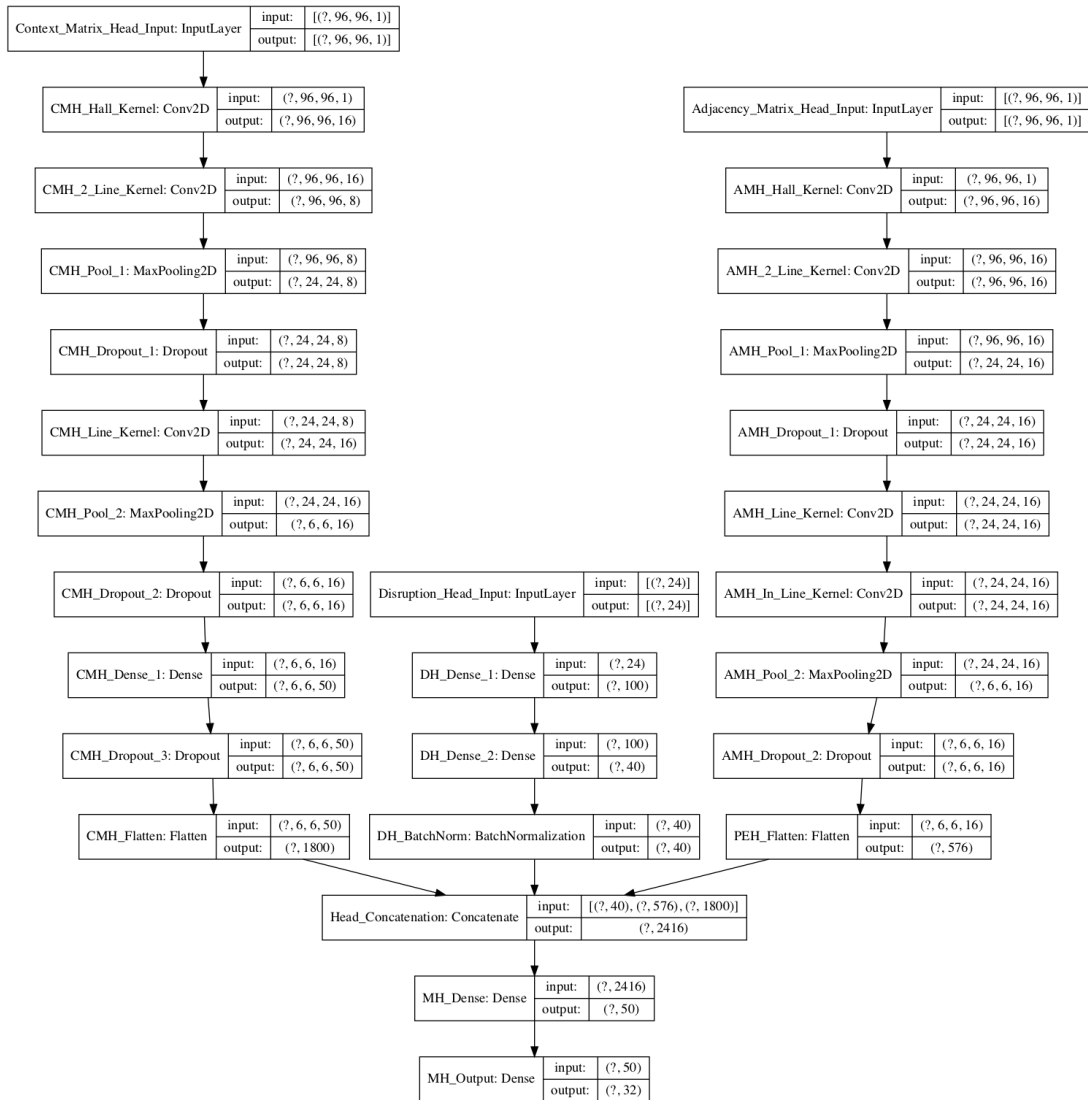

Figure 6: Visualization of the three-headed NN structure for disruption type classification. ? refers to the TensorFlow representation for the chosen batch-size of 32.
